# Supplementary material for: A dual-signal optical sensing platform of CDs–MnO2 NS composites for facile detection of ascorbic acid based on a combination of Tyndall effect scattering and fluorescence
Source: Royal Society of Chemistry journal article supplement (doi:10.1039/d4ra02340d), 2024-01-01
Supplement: d4ra02340d1.pdf [file d4ra02340d1.pdf]

1  
2  
3  
4  
5  
6  
7  
8  
9  
10  
11  
12  
13  
14  
15  
16  
17  
18  
19  
20  
21  
22  
23  
24  
25

Electronic Supplementary Information

**A dual-signal optical sensing platform of CDs-MnO<sub>2</sub> NS  
composites for facile detection of ascorbic acid based on a  
combination of Tyndall effect scattering and fluorescence**

ShuJing Zhou<sup>1</sup>, Jing Wan<sup>1</sup>, Jianmei Zou<sup>1,\*</sup>, Yulan Zhang<sup>1</sup>, Huijun He<sup>2</sup>, Wei Li<sup>1</sup>, Jiale  
Hu<sup>1</sup>, Jinfang Nie<sup>1</sup>, Yali Yuan<sup>1</sup>, Yun Zhang<sup>1,\*</sup>

1. College of Chemistry and Bioengineering, Guilin University of Technology,  
Guilin 541004, China.
2. Guangxi Key Laboratory of Environmental Pollution Control Theory and  
Technology, Guilin University of Technology, Guilin 541004, China

\* Corresponding Author.

E-mail: 2019136@glut.edu.cn, zy@glut.edu.cn

Tel: +86 773 5896453; Fax: +86 773 5896839.

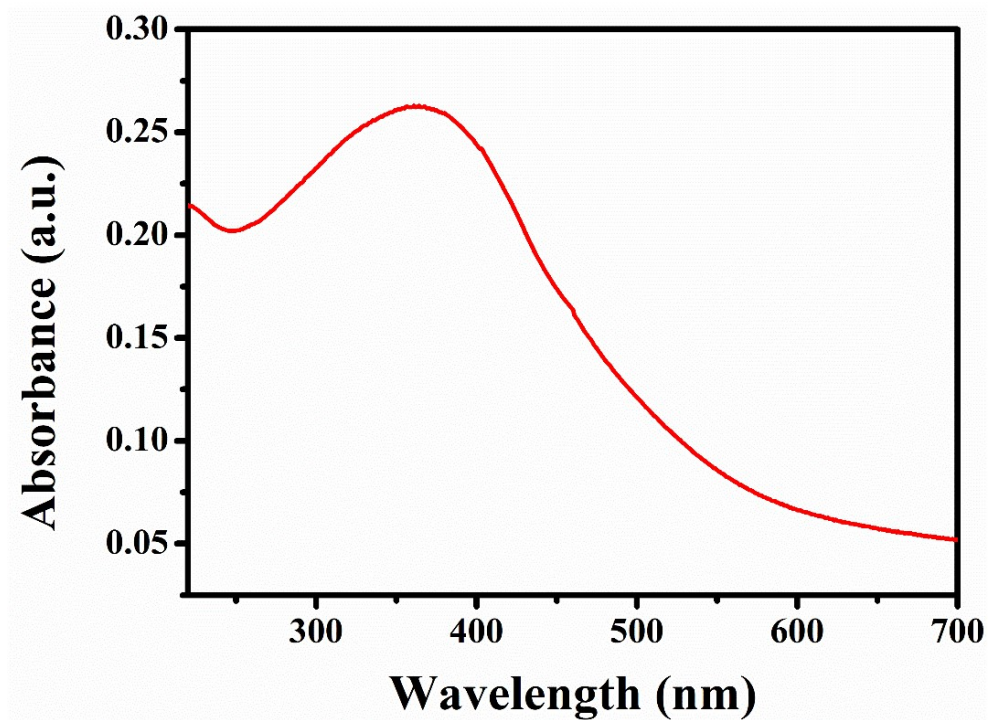

1  
2

3 **Fig. S1** UV-Vis absorption spectra of MnO<sub>2</sub> NSs.

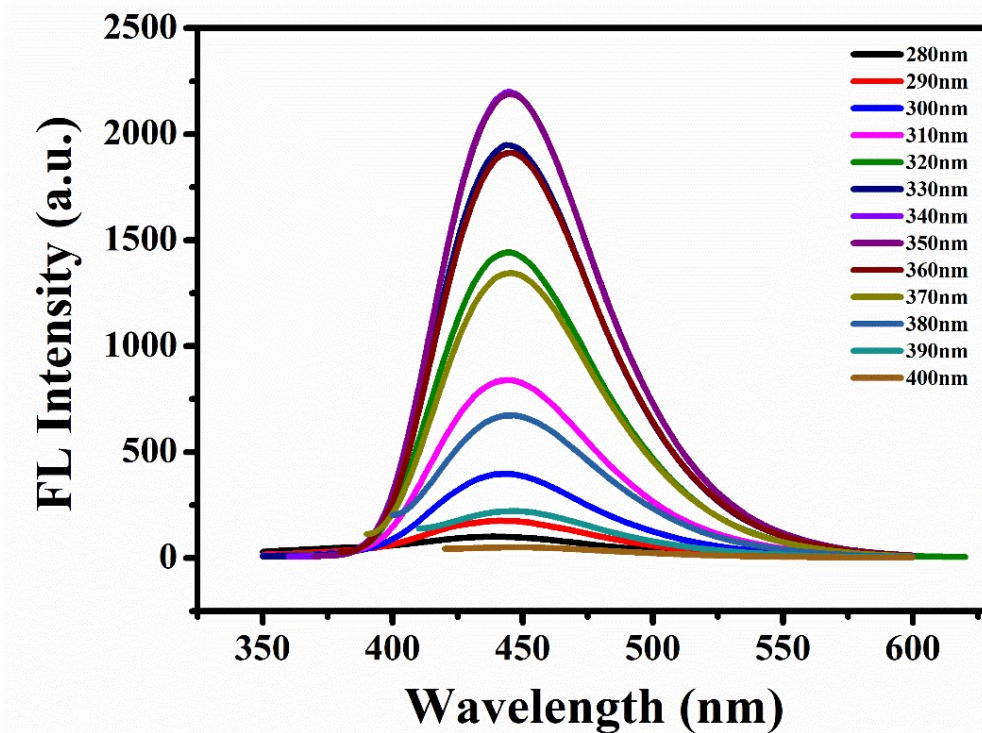

1  
2  
3

**Fig. S2** Fluorescence emission spectra of CDs at different excitation wavelengths.

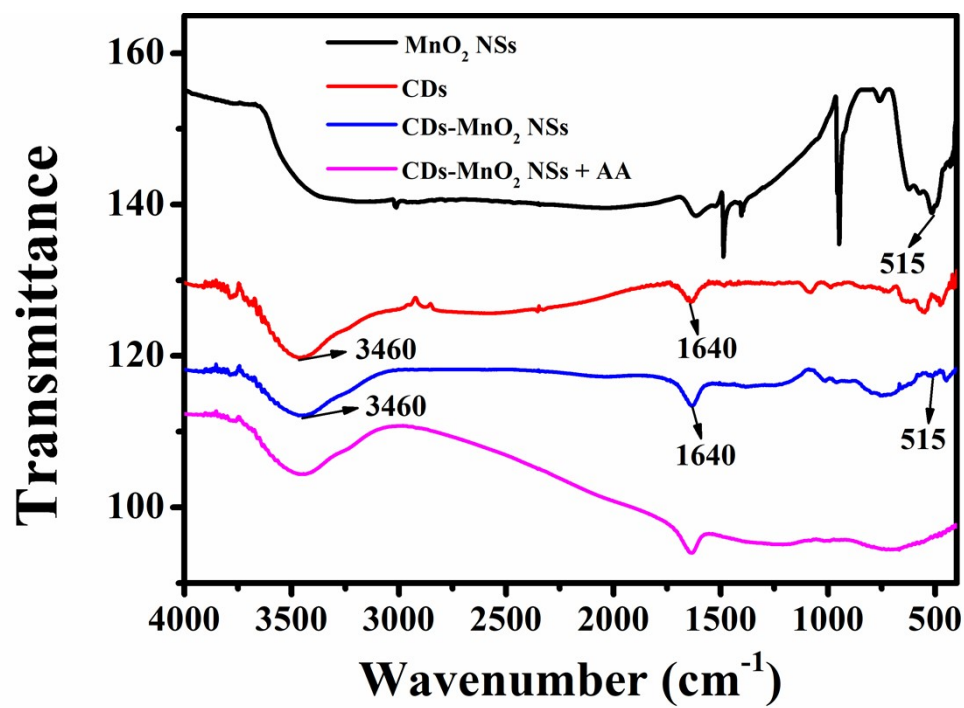

1  
2

3 **Fig. S3** FT-IR spectra of the MnO<sub>2</sub> NSs, CDs, CDs-MnO<sub>2</sub> NS and CDs-MnO<sub>2</sub> NS +

4 AA.

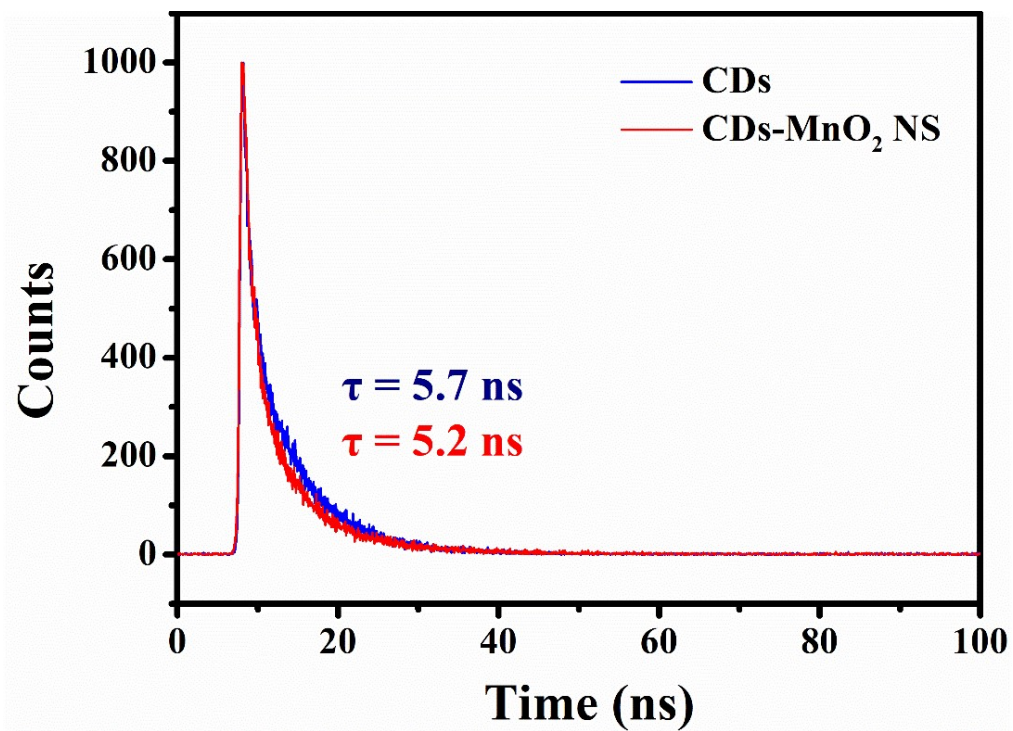

1  
2

3 **Fig. S4** Fluorescence lifetime of CDs and CDs-MnO<sub>2</sub> NS.

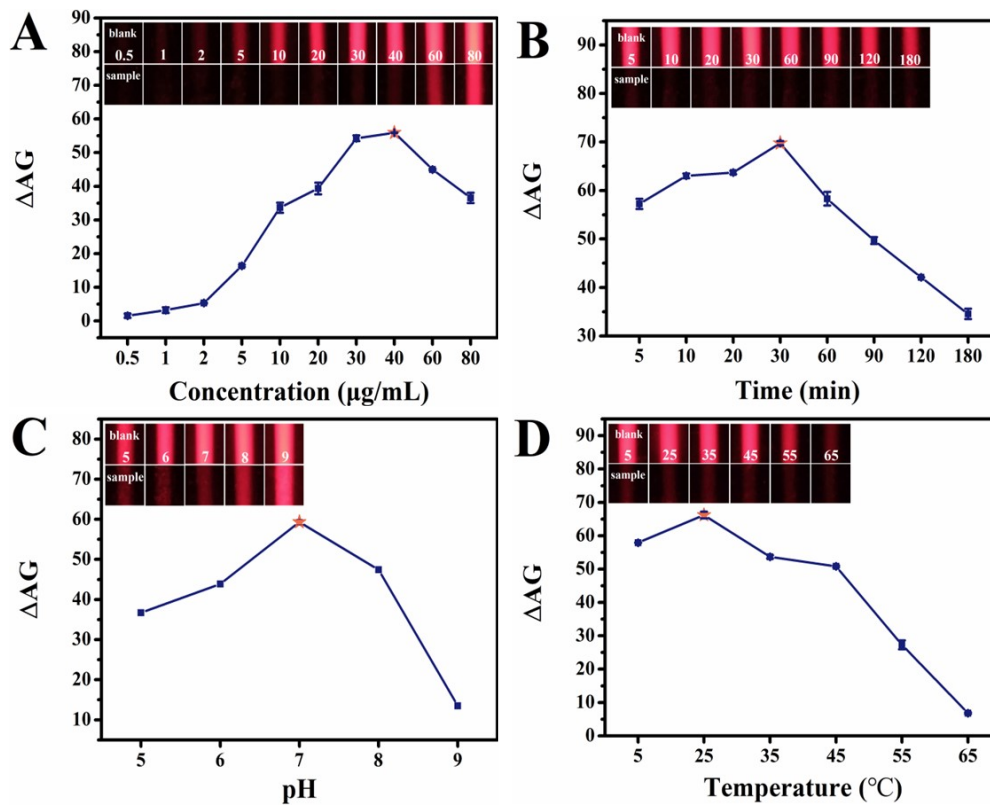

1

2

3 **Fig. S5** Optimizing conditions for detecting AA. The effects of MnO<sub>2</sub> NSs  
 4 concentrations (A), reaction time (B), pH (C) and temperatures (D) on TE of the dual-  
 5 signal optical sensing platform in the presence of 80  $\mu\text{M}$  AA.

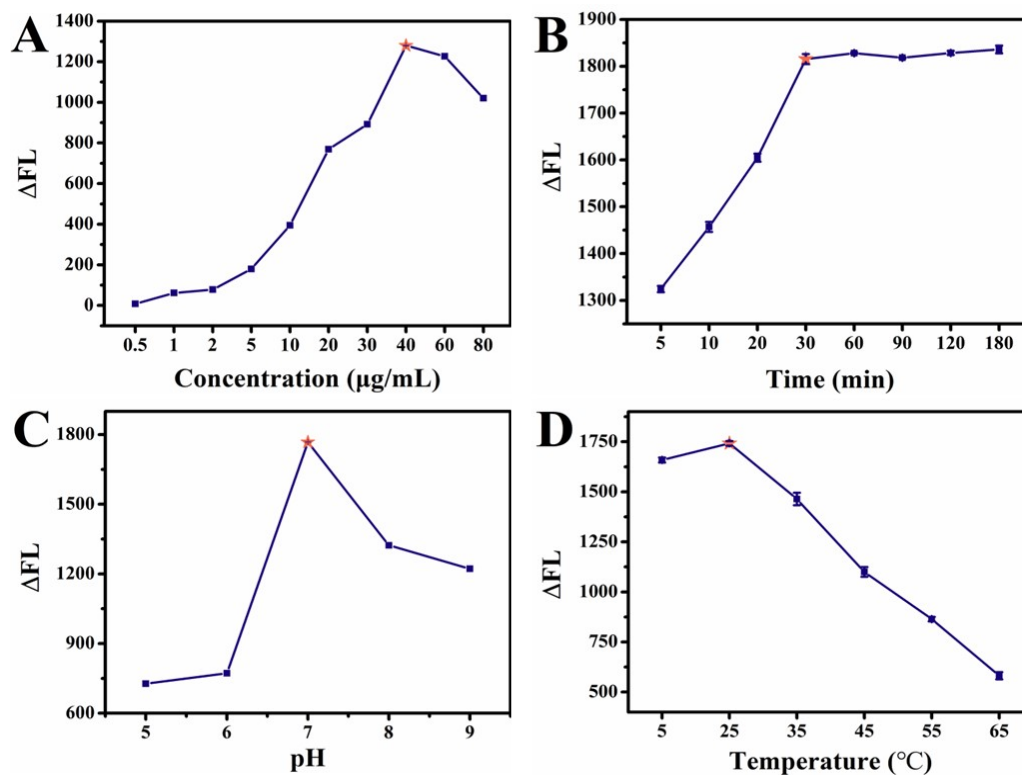

1  
2

3 **Fig. S6** Optimizing conditions for detecting AA. The effects of MnO<sub>2</sub> NSs  
4 concentrations (A), reaction time (B), pH (C) and temperatures (D) on fluorescence of  
5 the dual-signal optical sensing platform in the presence of 80 μM AA.

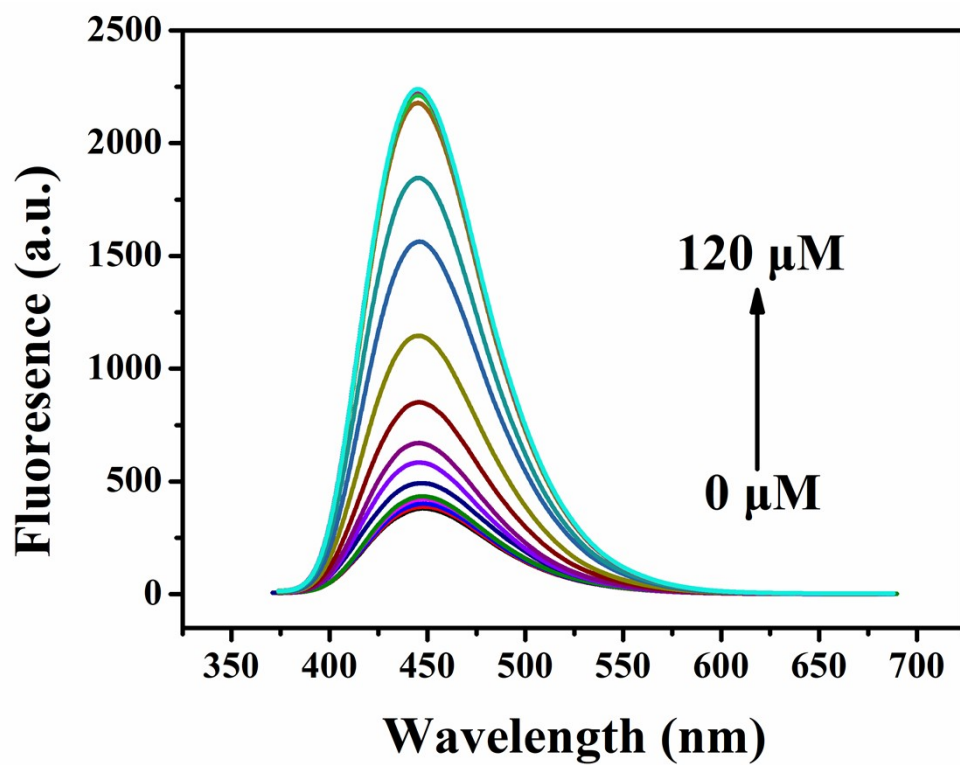

1

2

3 **Fig. S7** Fluorescence curves of CDs-MnO<sub>2</sub> NS incubated with different concentration

4 of AA (0.02, 0.05, 0.2, 0.6, 0.8, 1, 5, 2, 5, 8, 10, 20, 25, 40, 50, 80, 100 and 120 μM).



1 **Table S1** Comparison of AA detection between this work and reported methods.

| materials                         | method                            | linear range                                                                | LOD                                                                  | ref                                    |
|-----------------------------------|-----------------------------------|-----------------------------------------------------------------------------|----------------------------------------------------------------------|----------------------------------------|
| hCNTs-4ABA/Au-IDA                 | Electrochemistry                  | 50-600 $\mu\text{M}$                                                        | 0.65 $\mu\text{M}$                                                   | Llobregat et al., 2018 <sup>S1</sup> . |
| 3DGF/CuO                          | Electrochemistry                  | 0.43-200 mM                                                                 | 0.43 mM                                                              | Ma et al., 2014 <sup>S2</sup> .        |
| FeVO <sub>4</sub>                 | Electrochemistry                  | 0.1-0.3 mM                                                                  | 0.38 $\mu\text{M}$                                                   | Anwar et al., 2014 <sup>S3</sup> .     |
| Pt-HMCN                           | Colorimetry                       | 6-60 $\mu\text{M}$                                                          | 3.29 $\mu\text{M}$                                                   | Chen et al., 2020 <sup>S4</sup> .      |
| Au/Cu NRs                         | Colorimetry                       | 0-2 mM                                                                      | 25 $\mu\text{M}$                                                     | Xu et al., 2019 <sup>S5</sup> .        |
| Sc-MOF                            | Colorimetry                       | 0.2-20 $\mu\text{M}$                                                        | 0.174 $\mu\text{M}$                                                  | Su et al., 2019 <sup>S6</sup> .        |
| graphene oxide/HAuCl <sub>4</sub> | Smartphone                        | 20-375 $\mu\text{M}$                                                        | 1.04 $\mu\text{M}$                                                   | Ji et al., 2018 <sup>S7</sup> .        |
| N-CD                              | Smartphone                        | 150-550 $\mu\text{M}$                                                       | 59.83 $\mu\text{M}$                                                  | Kayani et al., 2024 <sup>S8</sup> .    |
| Fe <sub>1-x</sub> S               | Smartphone                        | 10-500 $\mu\text{M}$                                                        | 0.93 $\mu\text{M}$                                                   | Cao et al., 2024 <sup>S9</sup> .       |
| RhB@DiCH <sub>3</sub> MOF-5       | Fluorometry                       | 1-25 $\mu\text{M}$                                                          | 0.31 $\mu\text{M}$                                                   | Guo et al., 2019 <sup>S10</sup> .      |
| AuNCs-PbS-QDs                     | Fluorometry                       | 3-40 $\mu\text{M}$                                                          | 1.5 $\mu\text{M}$                                                    | Zhao et al., 2015 <sup>S11</sup> .     |
| Eu MOF                            | Fluorometry                       | 0-3.0 $\mu\text{M}$                                                         | 0.32 $\mu\text{M}$                                                   | Dong et al., 2015 <sup>S12</sup> .     |
| N/S-GQDs/KMnO <sub>4</sub>        | Fluorometry<br>and                | 0.01-225 $\mu\text{M}$<br>and                                               | 0.008 $\mu\text{M}$<br>and                                           | Bezuneh et al., 2018 <sup>S13</sup> .  |
| BNS-CDs@Fe <sup>3+</sup>          | Colorimetry<br>Fluorometry<br>and | 0.1-30 $\mu\text{M}$<br>0.1-600 $\mu\text{M}$<br>and<br>1-110 $\mu\text{M}$ | 0.11 $\mu\text{M}$<br>0.05 $\mu\text{M}$<br>and<br>0.3 $\mu\text{M}$ | Liu et al., 2018 <sup>S14</sup> .      |
| CDs-MnO <sub>2</sub> NS           | Smartphone<br>and<br>Fluorometry  | 0.4-100 $\mu\text{M}$<br>and<br>0.02-50 $\mu\text{M}$                       | 0.113 $\mu\text{M}$<br>and<br>0.003 $\mu\text{M}$                    | This Work                              |

2

3

4 **References**

- 1 S1. A. Llobregat, C. Gaitán, L. Vidal, A. Canals, E. Morallón, *Biosens. Bioelectron* ,  
2 2018, 109, 123-131.
- 3 S2. Y. Ma, M. Zhao, B. Cai, W. Wang, Z. Ye, J. Huang, *Biosens. Bioelectron* , 2014,  
4 59, 384-388.
- 5 S3. N. Anwar, M. Sajid, M. Iqbal, H. Zhai, M. Ahmed, B. Anwar, K. Morsy, R.  
6 Capangpangan, A. Alguno, J. Choi, *ACS Omega* , 2023, 8, 15450-15457.
- 7 S4. H. Chen, C. Yuan, X. Yang, X. Cheng, A. Elzatahry, A. Alghamdi, J. Su, X. He,  
8 Y. Deng, *ACS Appl. Energy Mater* , 2020, 3, 4586-4598.
- 9 S5. S. Xu, X. Dong, S. Chen, Y. Zhao, G. Shan, Y. Sun, Y. Chen, Y. Liu, *Sens.*  
10 *Actuators B Chem* , 2019, 281, 375-382.
- 11 S6. Y. Su, H. Wu, J. Chen, H. Li, P. Lin, W. Xiao, D. Cao, *CrystEngComm* , 2022,  
12 25, 3472-3483.
- 13 S7. D. Ji, Z. Liu, L. Liu, S. Low, Y. Lu, X. Yu, L. Zhu, C. Li, Q. Liu, *Biosens.*  
14 *Bioelectron* , 2018, 119, 55-62.
- 15 S8. K. Kayani, C. Abdullah, *J. Fluoresc* , 2024, 1-13.
- 16 S9. B. Cao, G. Gao, J. Zhang, Z. Zhang, T. Sun, *Microchem. J* , 2023, 193, 109018.
- 17 S10. L. Guo, Y. Liu, R. Kong, G. Chen, Z. Liu, F. Qu, L. Xia, W. Tan, *Anal. Chem*  
18 , 2019, 91, 12453-12460.
- 19 S11. P. Zhao, K. He, Y. Han, Z. Zhang, M. Yu, H. Wang, Y. Huang, Z. Nie, S. Yao,  
20 *Anal. Chem* , 2015, 87, 9998-10005.
- 21 S12. X. Dong, T. Chen, X. Kong, S. Wu, F. Kong, Q. Xiao, *Anal. Methods* , 2023,  
22 16, 704-708.
- 23 S13. T. Bezuneh, F. Bushira, N. Ofgea, C. Zhang, H. Li, Y. Jin, *Microchem. J* , 2023,  
24 197, 109837.
- 25 S14. Y. Liu, Z. Wei, W. Duan, C. Ren, J. Wu, D. Liu, H. Chen, *Dyes Pigm* , 2018,  
26 149, 491-497.
